# Supplementary figures and images for: Clathrin modulates vesicle scission, but not invagination shape, in yeast endocytosis
Source: eLife journal article supplement (doi:10.7554/elife.16036), 2016-06-24

# Figure 1 —figure supplement 1

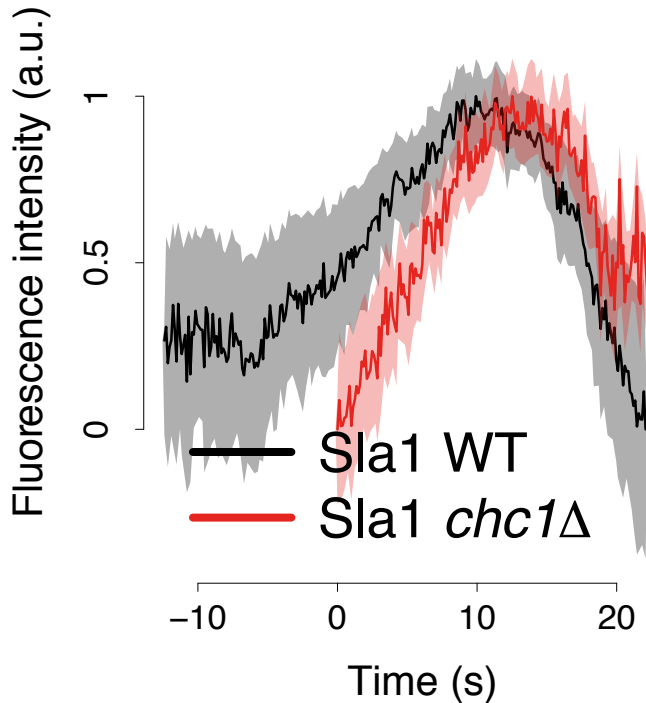

Supplement: supp [file elife-16036-supp-v1.zip]

# Figure 2—figure supplement 1

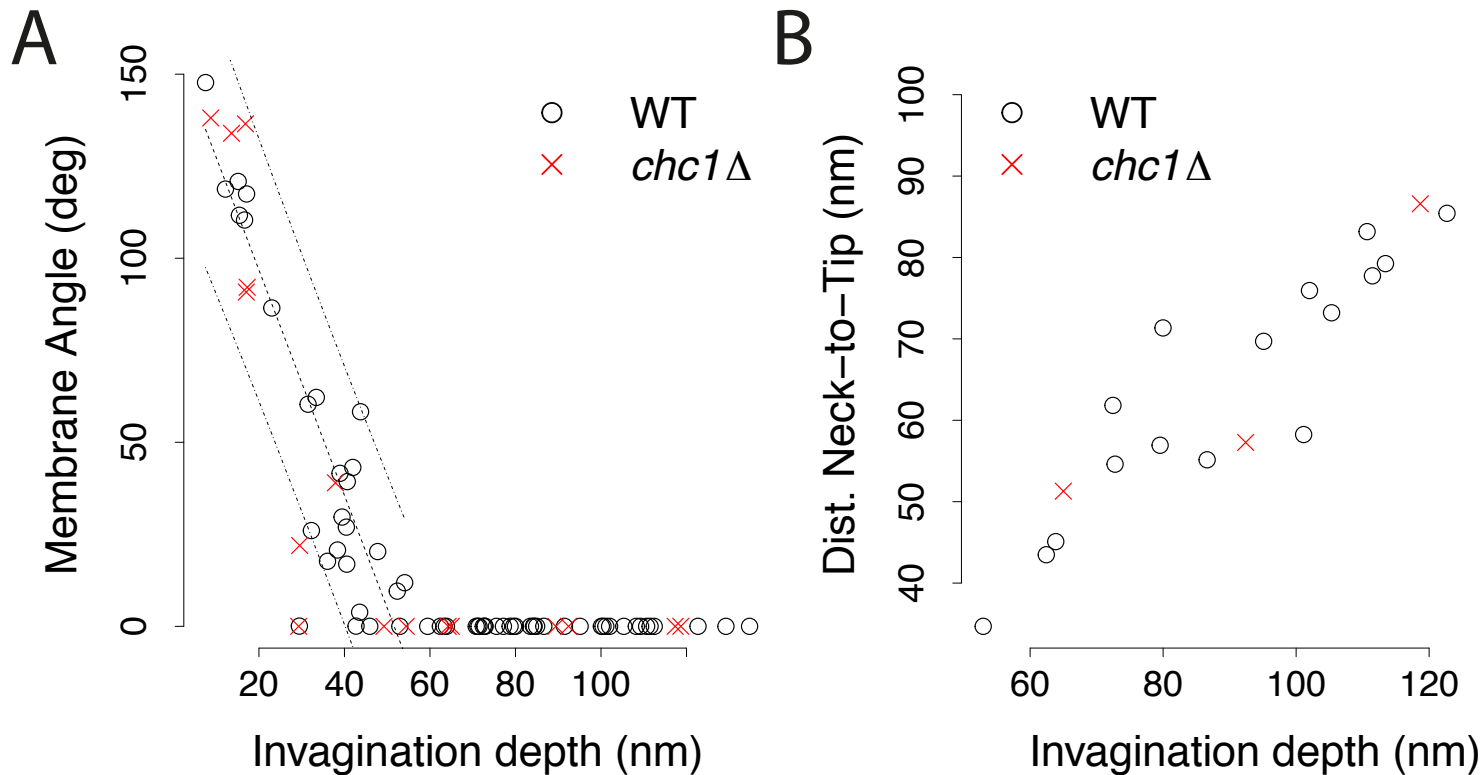

Supplement: supp [file elife-16036-supp-v1.zip]
